# Supplementary material for: A novel CuCoS nanozyme for synergistic photothermal and chemodynamic therapy of tumors
Source: Royal Society of Chemistry journal article supplement (doi:10.1039/d1qi01563j), 2022-01-01
Supplement: d1qi01563j1.pdf [file d1qi01563j1.pdf]

## Supporting Information

A novel CuCoS Nanozyme for Synergistic Photothermal and  
Chemodynamic Therapy of Tumor

Guoqing Zhu, Pan Zheng,\* Man Wang, Weilin Chen, and Chunxia Li\*

Institute of Molecular Sciences and Engineering, Institute of Frontier and  
Interdisciplinarity Science, Shandong University, Qingdao, 266237, P. R. China

## Photothermal effect of CuCoS NPs

To measure the photothermal effect of CuCoS nanoparticles, different concentrations of nanoparticles (0, 25, 50, 75 and 100  $\mu\text{g mL}^{-1}$ ) were placed in centrifuge tubes. Then they were irradiated with an 808 nm laser ( $1 \text{ W cm}^{-2}$ ) for 5 min. The temperature was monitored by an infrared thermal imager and recorded every 30 s. Then the laser power was varied (0.25, 0.5, 0.75 and  $1 \text{ W cm}^{-2}$ ) to investigate the effect of laser power on the photothermal effect. The photothermal conversion efficiency was calculated by Equation (1).

$$\eta = \frac{hS(T_{max,NP} - T_{surr}) - Q_{dis}}{I(1 - 10^{-A_{808}})} \quad (1)$$

where  $h$  is the heat transfer coefficient.  $S$  is the surface area of the vessel.  $T_{max}$  is the maximum temperature of the solution.  $T_{surr}$  is the ambient temperature.  $Q_{dis}$  the heat generated by the absorption of light by water.  $I$  is the laser power density.  $A_{808}$  is the absorption value of the material at 808 nm. Where  $hS$  can be calculated by equation (2) and (3).

$$Q_{dis} = hS(T_{max,H_2O} - T_{surr}) \quad (2)$$

$$\tau_s = \frac{m_D C_D}{hS} \quad (3)$$

$m_D$  is the mass of  $\text{H}_2\text{O}$  and  $C_D$  is the heat capacity of  $\text{H}_2\text{O}$ ,  $\tau_s$  is the fitted time constant, calculated by Eq. (4) and (5):

$$t = -\tau_s \ln \theta \quad (4)$$

$$\theta = \frac{T_{surr} - T}{T_{surr} - T_{max}} \quad (5)$$

where  $t$  is the cooling time,  $T$  is the temperature at cooling  $t$  s, and  $\theta$  is a dimensionless dynamic temperature introduced to calculate  $\tau_s$ .

## Detection of ROS

Methylene blue (MB) was chosen as a probe to detect hydroxyl radicals. Hydroxyl radicals will oxidize MB to discolor the solution and decrease the absorption peak at

660 nm. CuCoS ( $50 \mu\text{g mL}^{-1}$ ),  $\text{H}_2\text{O}_2$  ( $0.2 \text{ mmol L}^{-1}$ ) was added to 2 mL of PBS. MB ( $20 \mu\text{g mL}^{-1}$ ) was then added. The solution was placed for 0, 10, 20, 30, 40 and 50 min. The change in the absorption peak at 660 nm was recorded by UV-vis spectrophotometer.

ESR was the most direct evidence for the detection of  $\cdot\text{OH}$ , which was captured using DMPO. CuCoS ( $50 \mu\text{g mL}^{-1}$ ),  $\text{H}_2\text{O}_2$  ( $0.2 \text{ mmol L}^{-1}$ ) was added to 2 mL of PBS (pH 5.66). DMPO (25 mM) was added afterwards. ESR spectra were recorded at 0 and 10 min of the reaction.

### **Cell culture**

L929 fibroblasts were inoculated in DMEM medium supplemented with 10% FBS, penicillin ( $100 \text{ units mL}^{-1}$ ) and streptomycin ( $100 \mu\text{g mL}^{-1}$ ), 5%  $\text{CO}_2$  at  $37^\circ\text{C}$ . Breast cancer 4T1 cells were inoculated at  $37^\circ\text{C}$  in RPMI 1640 medium supplemented with 10% FBS, penicillin ( $100 \text{ units mL}^{-1}$ ) and streptomycin ( $100 \mu\text{g mL}^{-1}$ ) and 5%  $\text{CO}_2$ .

### **Cell uptake assay of CuCoS NPs**

4T1 cells were inoculated in 6-well plates at a density of  $1 \times 10^5$  cells per well and cultured overnight. The original culture medium was replaced with fresh medium containing Cy-CuCoS ( $100 \mu\text{g mL}^{-1}$ ). After 4 h of warming, cell uptake was detected using flow cytometry.

4T1 cells were inoculated at a density of  $1 \times 10^5$  cells per well in confocal culture dishes and incubated overnight. The original medium was then replaced with fresh medium containing Cy-CuCoS ( $100 \mu\text{g mL}^{-1}$ ). After 4 h of warming, cell uptake was observed by confocal laser scanning microscope.

### **Intracellular ROS detection**

In vitro ROS production was detected by the cell-permeable dye 2',7'-dichlorofluorescein diacetate (DCFH-DA 10 mM). DCFH-DA itself is not fluorescent and it is readily oxidized by intracellular ROS to 2',7' dichlorofluorescein (DCF), which has green fluorescence. 4T1 cells were inoculated into 12-well plates at a density of  $0.2 \times 10^5$  cells per well and incubated at  $37^\circ\text{C}$ , 5%  $\text{CO}_2$  for 24 h. Then, four groups: were divided (1) CuCoS + Laser; (2) CuCoS; (3) laser; (4) control (medium) treatment. The ROS probe was then added to each well and the mixture was incubated

at 37°C for 30 min. Finally, the cells were washed repeatedly with PBS. Fluorescence detection using fluorescence microscopy.

### **Intracellular GSH detection**

4T1 cells were inoculated in 6-well plates at a density of  $1 \times 10^5$  cells per well and cultured overnight. Then, they were treated in 4 groups: (1) CuCoS + Laser; (2) CuCoS; (3) laser; (4) control (medium). The amount of GSH was measured using a GSH assay kit (Abbkine, KTB1600) according to the instructions.

### **Hemolysis Assay**

Red blood cells (RBCs) were isolated and washed from serum by centrifugation, and diluted with PBS. Then, 0.5 mL of RBC suspension was mixed with 0.5 mL of CuCoS (0.16, 0.31, 0.63, 1.25, 2.5, 5 mg mL<sup>-1</sup>) in PBS. Deionized (DI) water and PBS were used as positive and negative controls, respectively. The treated suspension was cultured at 37 °C for 1 h. Then the samples were centrifuged and the supernatants were collected to analyze by UV-vis spectrometer.

### **H&E staining**

The H&E staining was according to our previous report.<sup>1</sup> The typical steps are as follows:

1. Clear the paraffin from glass slides of tissue in two changes of xylene for 20 min per change.
2. Hydrate the glass slides of tissue through immersing it in 100% ethanol for 5 min, 100% ethanol for 5 min, 75% ethanol for 5 min, tap water for 5 min, and tap water for 5 min.
3. Stain the glass slides of tissue in hematoxylin solution for 5 min, rinse it in running tap water for 3 min, differentiate it with differentiation solution, rinse it in running tap water for 3 min, stain it with SYMPHONY B, and rinse it in running tap water for 3 min.
4. Immerse the glass slides of tissue in 85% ethanol for 5 min, 95% ethanol for 5 min, and stain it in eosin solution for 5 min.
5. Immerse the glass slides of tissue in 100% ethanol for 5 min, 100% ethanol for 5 min, 100% ethanol for 5 min, xylene for 5 min, and xylene for 5 min.

6. Seal the glass slides of tissue with neutral gum.

7. The glass slides with H&E staining are measured by a microscope.

**Statistical Analysis.** All experiments in our study were investigated at least three times, and the data were showed as mean  $\pm$  standard deviation. Differences between different groups were calculated by  $f_x$ -T.TEXT in Microsoft Office Excel 2016 (Redmond, WA, USA). \* $P < 0.05$  was considered to be a significant difference, and \*\* $P < 0.01$  and \*\*\* $P < 0.001$  were received as highly significant difference.

## References

1. P. Zheng, B. Ding, R. Shi, Z. Jiang, W. Xu, G. Li, J. Ding and X. Chen, A Multichannel  $\text{Ca}^{2+}$  Nanomodulator for Multilevel Mitochondrial Destruction-Mediated Cancer Therapy, *Adv. Mater.*, 2021, **33**, 2007426.

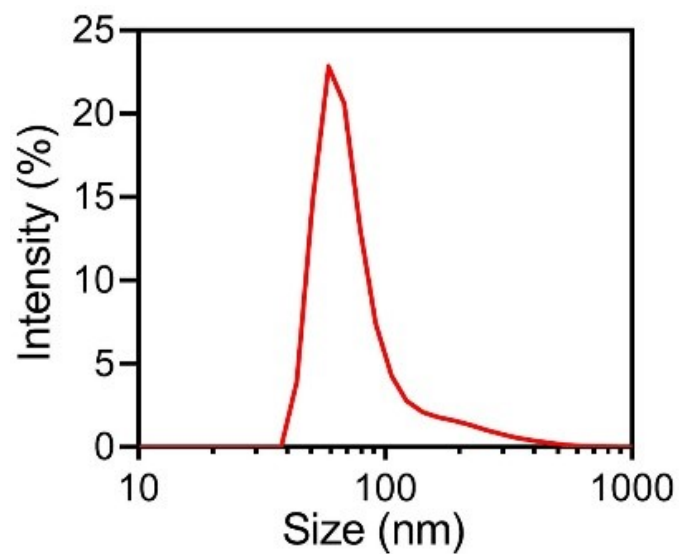

**Fig. S1.** The DLS data of CuCoS NPs.

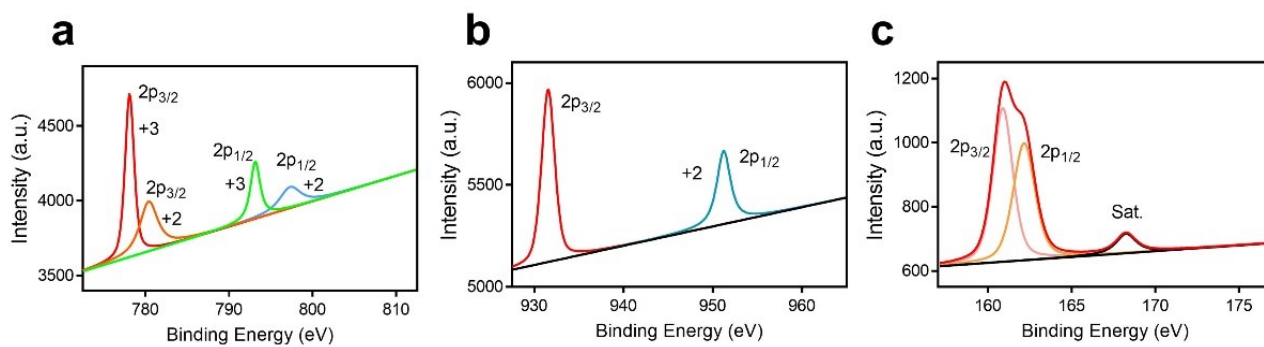

**Fig. S2.** Co 2p XPS (a) Cu 2p XPS (b) and S 2p XPS (c) spectra of CuCoS NPs.

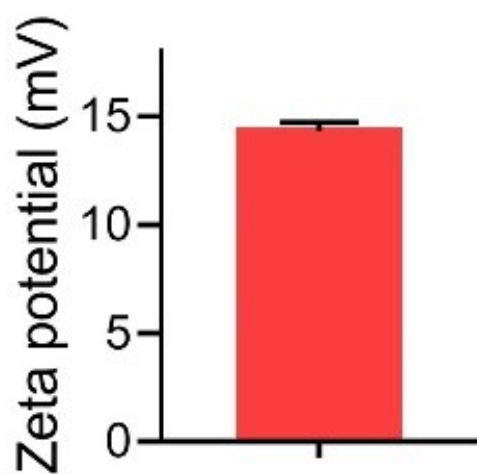

**Fig. S3.** The zeta potential data of CuCoS NPs.

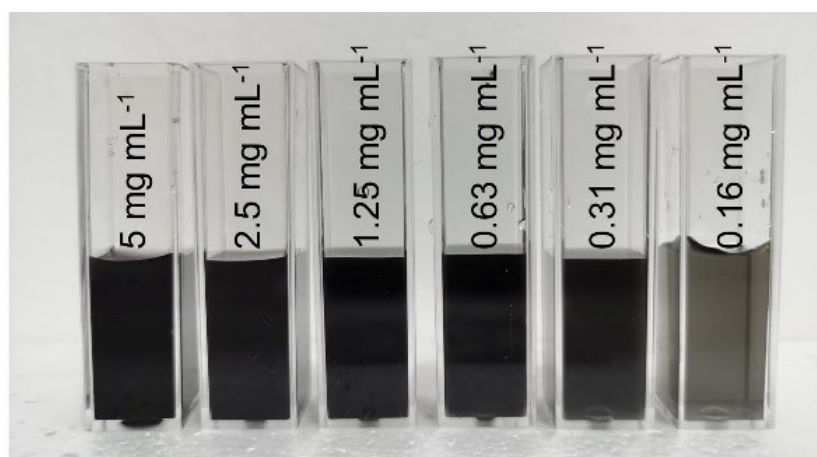

**Fig. S4.** The images of different concentration of CuCoS NPs dispersed in PBS.

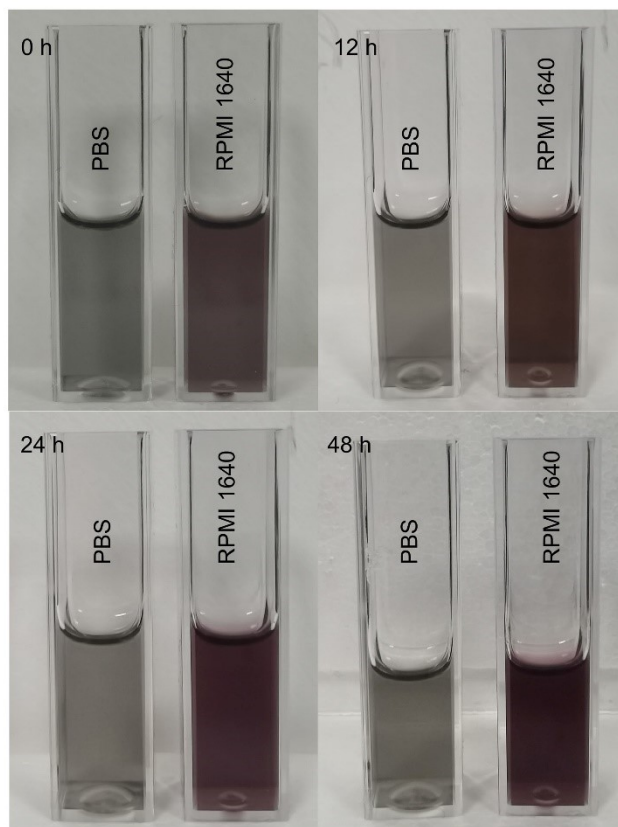

**Fig. S5.** The images of CuCoS NPs dispersed in PBS and RPMI 1640 medium for different time.

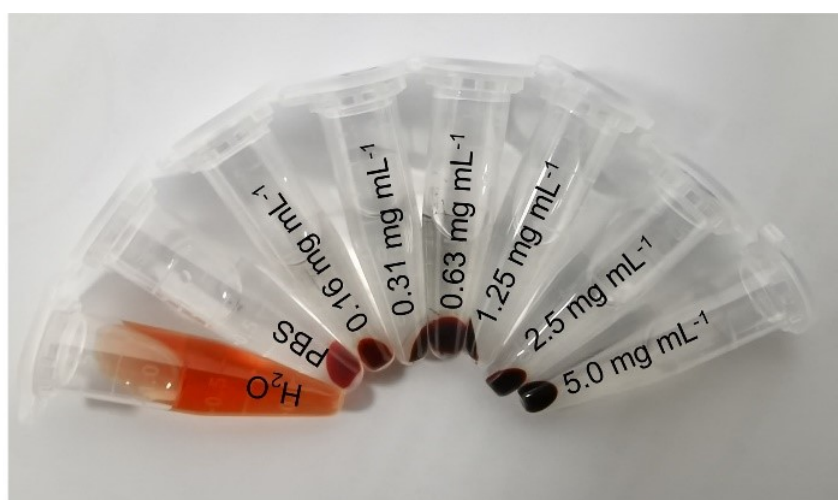

**Fig. S6.** The images of different concentration of CuCoS NPs-treated blood.



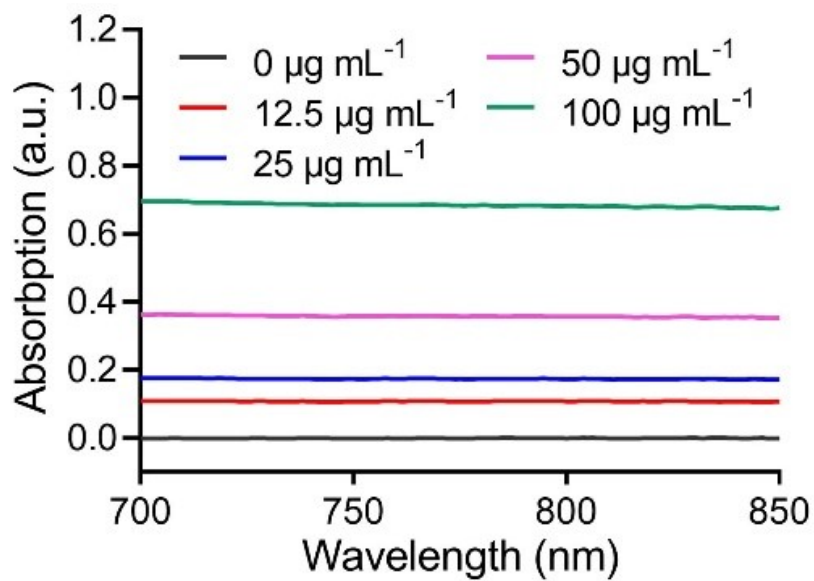

**Fig. S7.** The Vis–NIR absorption spectra of different concentration of CuCoS NPs.

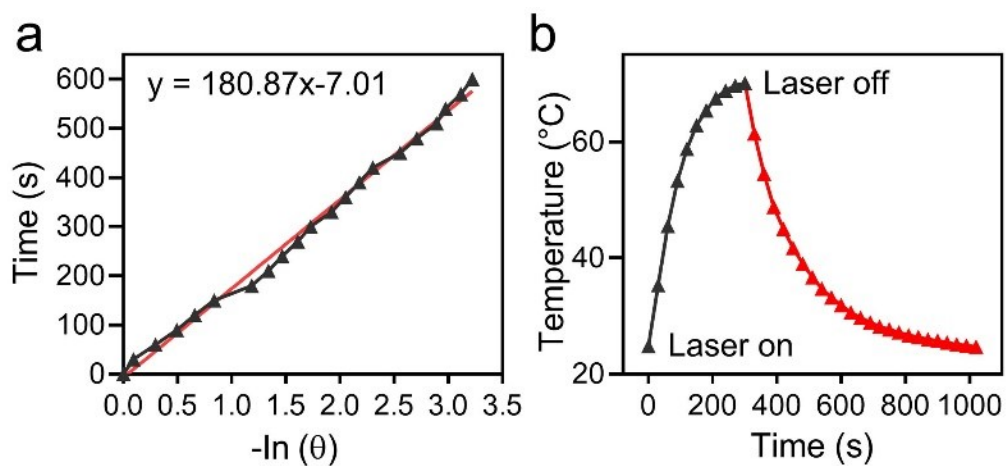

**Fig. S8.** (a) Linear time data obtained from the cooling period; (b) Heating and cooling curve of CuCoS NPs.

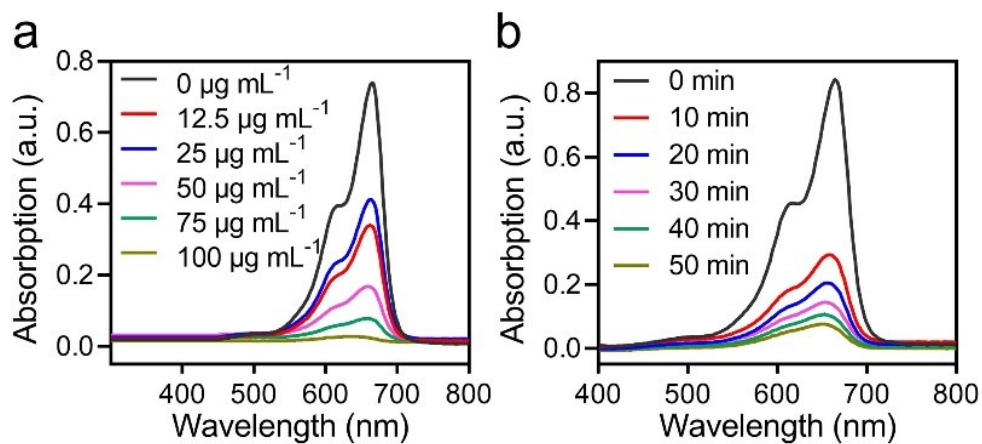

**Fig. S9.** (a) Absorption curves of MB degraded by different concentrations of CoCuS NPs; (b) Absorption curves of MB degraded at different time (the concentration of CuCoS NPs is 50  $\mu\text{g mL}^{-1}$ ).

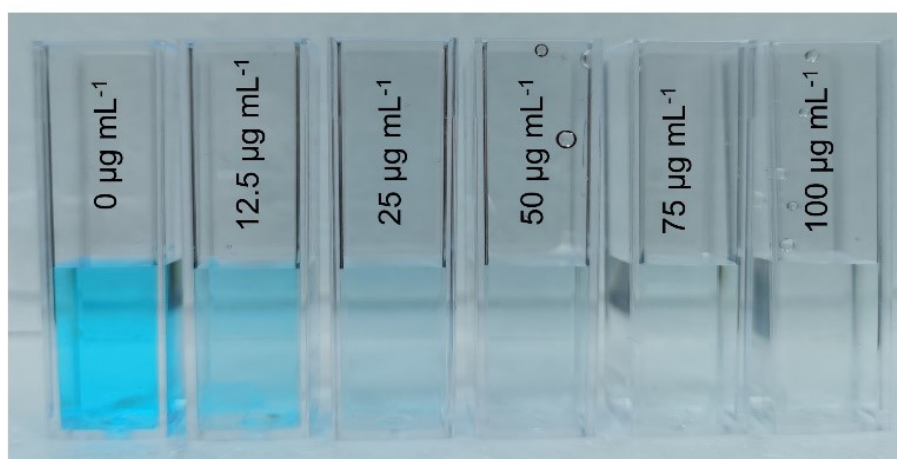

**Fig. S10.** The images of MB degraded by different concentrations of CoCuS NPs.

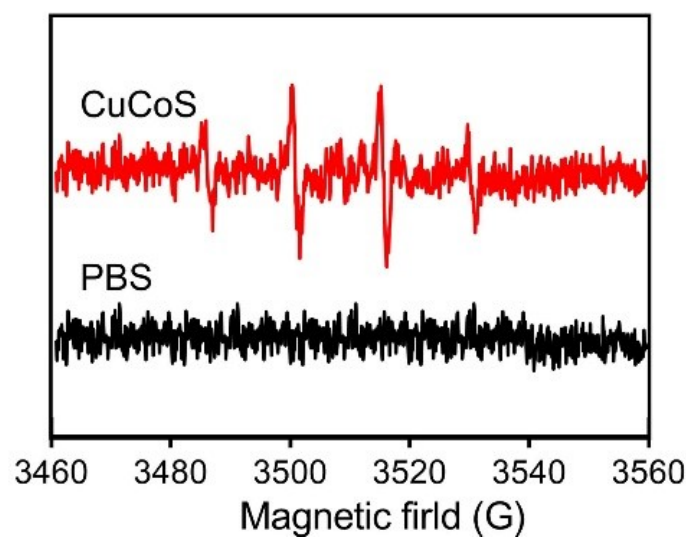

**Fig. S11.** ESR spectra of CuCoS NPs.

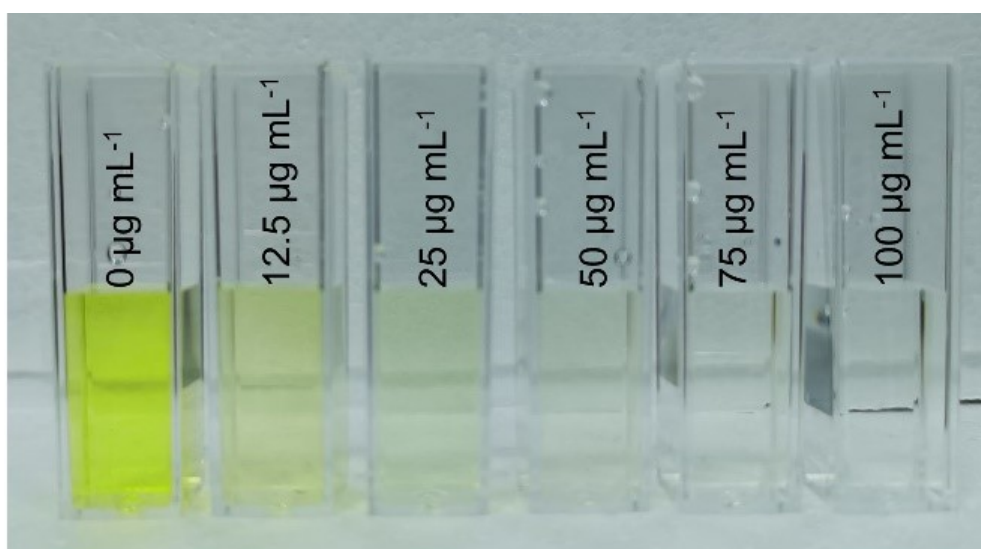

**Fig. S12.** The images of GSH depletion by different concentrations of CoCuS NPs.

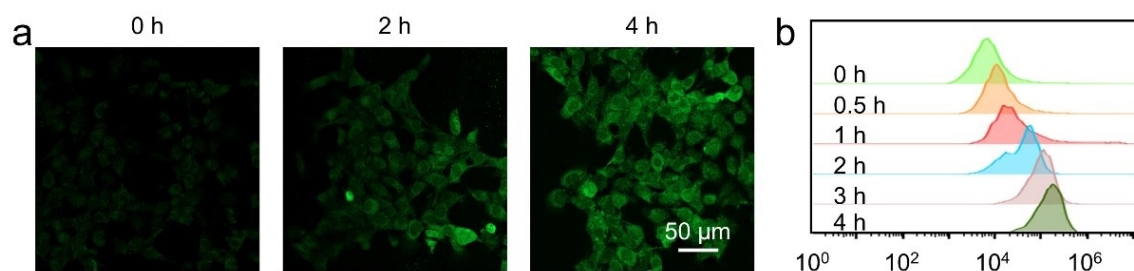

**Fig. S13.** (a) Fluorescent microscopy images of intracellular ROS generation treated with CuCoS NPs at different time; (b) Flow cytometry analysis of intracellular ROS generation treated with CuCoS NPs at different time.

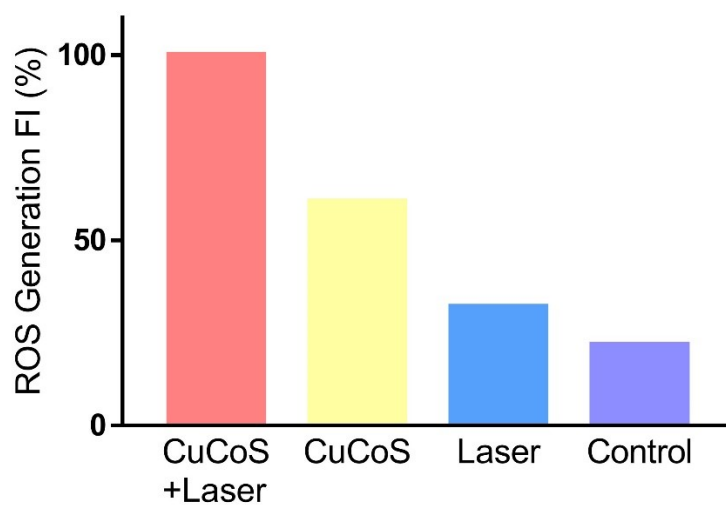

**Fig. S14.** The fluorescence intensity of Intracellular ROS generation.

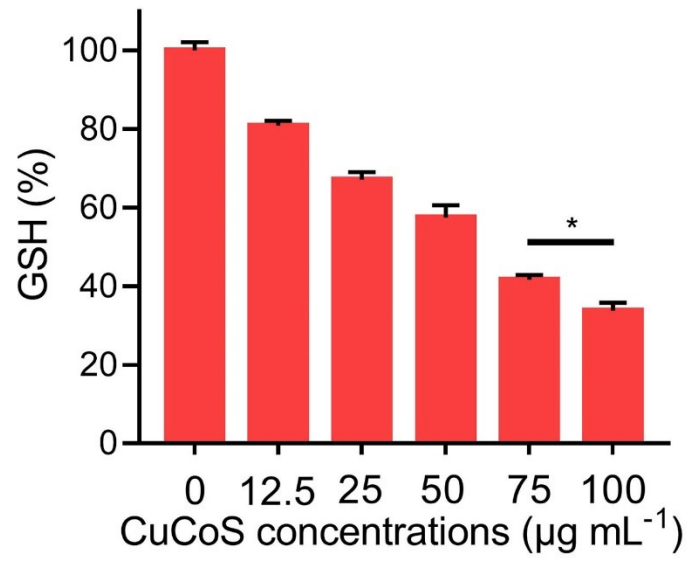

**Fig. S15.** The amounts of intracellular GSH treated with CuCoS NPs at different time.

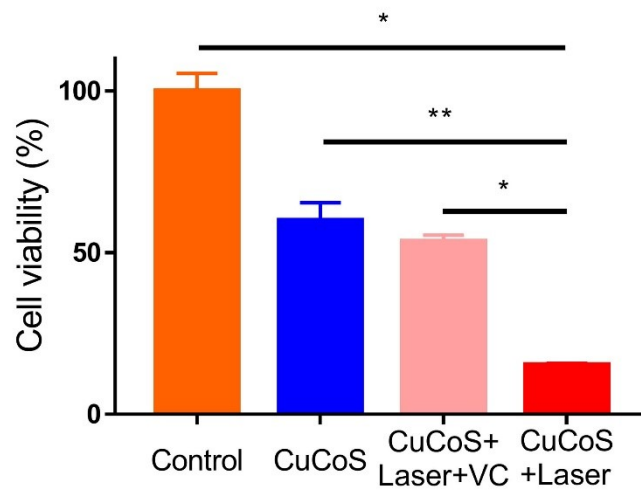

**Fig. S16.** Cell viabilities of 4T1 cells after different treatments.

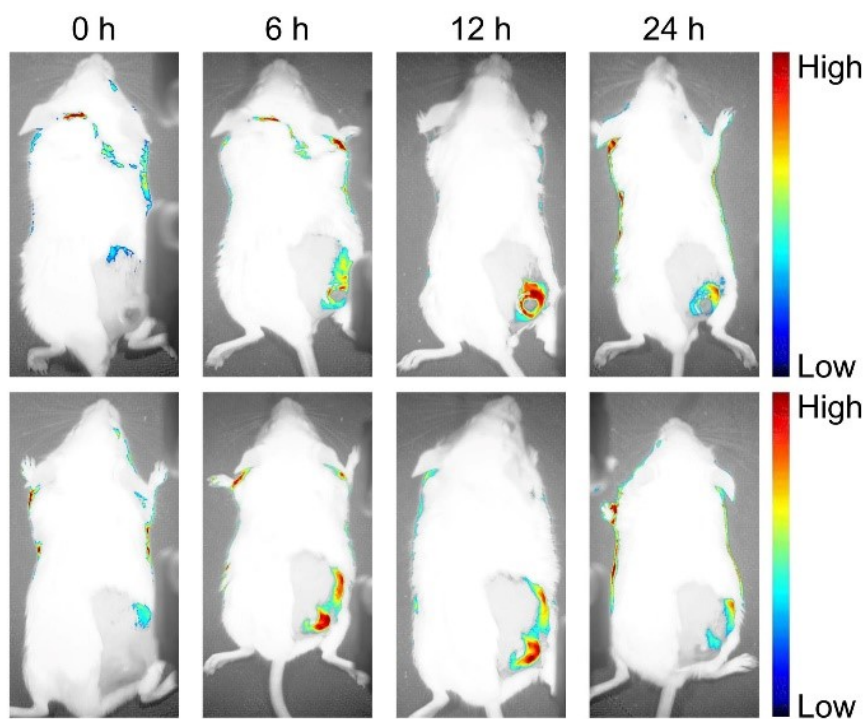

**Fig. S17.** The fluorescence imaging of 4T1-tumor-bearing mice i.v. injected with Cy-CuCoS NPs with the concentration of  $5 \text{ mg mL}^{-1}$ .

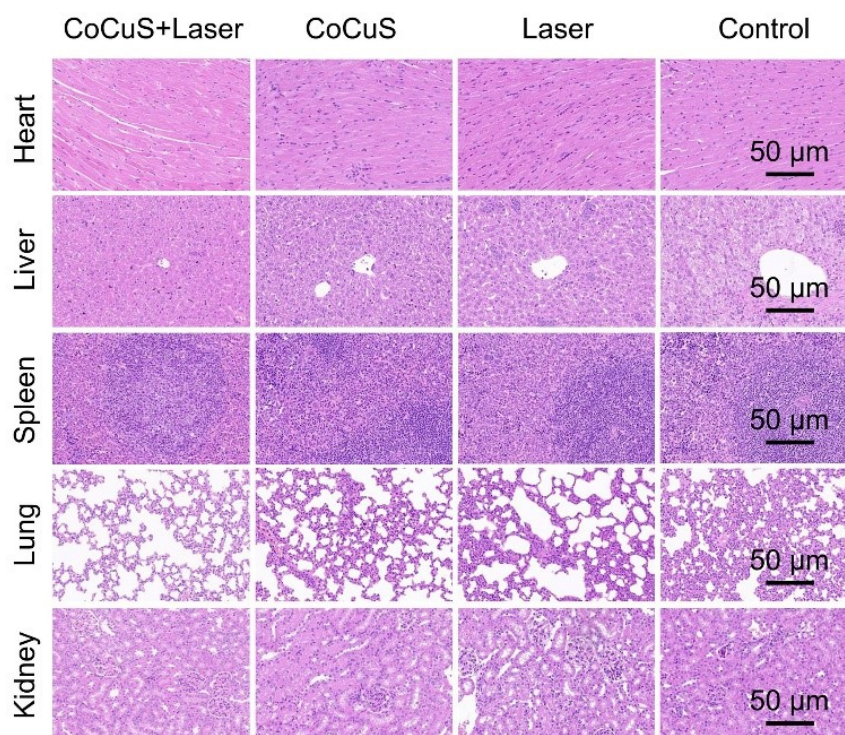

**Fig. S18.** Histochemical analysis of heart, liver, spleen, lung and kidney.
